# Supplementary material
Source: publisher figshare collection journal article supplement (https://karger.figshare.com/ndownloader/files/28562154)
Supplement: Supplementary file 1 [file 28562154]

**Supplemental table 1. Univariate analysis of correlations between hs-cTnT and coefficients**

| **Variable** | **Hs-cTnT (pg/ml)** | |
| --- | --- | --- |
| **Rho** | **pvalue** |
| **Age (years)** | 0.11 | 0.13 |
| **BMI (kg/m2)** | 0.34 | <0.001 |
| **Dialysis vintage (months)** | 0.40 | <0.001 |
| **SBP (mm Hg)** | 0.48 | <0.001 |
| **DBP (mm Hg)** | 0.29 | <0.001 |
| **Kt/V** | -0.06 | 0.37 |
| **Ultrafiltration Volume (kg/each time)** | -0.20 | 0.01 |
| **Scr (umol/L)** | 0.27 | <0.001 |
| **Albumin (g/L)** | 0.07 | 0.27 |
| **Hemoglobin (g/L)** | 0.08 | 0.17 |
| **Cholesterol (mmol/L)** | 0.11 | 0.11 |
| **Calcium(mmol/L)** | 0.06 | 0.31 |
| **Phosphorus(mmol/L)** | 0.07 | 0.30 |
| **iPTH (pg/ml)** | 0.41 | <0.001 |
| **BNP (pg/ml)** | 0.35 | <0.001 |
| **LVMI (g/m2)** | 0.59 | <0.001 |
| **LVEF (%)** | -0.08 | 0.27 |
| **E/E'** | 0.68 | <0.001 |
| **LAD (mm)** | -0.01 | 0.91 |
| **E/A** | 0.14 | 0.06 |

Notes:

BMI=Body mass index; LVH=left ventricular hypertrophy; IHD=ischemic heart disease; SBP=systolic blood pressure; DBP=diastolic blood pressure; hs-cTnT=high sensitive cardiac tropnin T; BNP=B-type natriuretic peptide; Scr=serum creatinine; iPTH=intact parathyroid hormone; LVMI=left ventricular mass index; LVEF=left ventricular ejection fraction; E/E’=diastolic left ventricular function; LAD=left atrial diameter.
